# Supplementary material
Source: PubMed Central journal article supplement (PMC8302931)
Supplement: mmc1.pdf [file mmc1.pdf]

**Prognosis of French COVID-19 patients with chronic liver disease:  
A national retrospective cohort study for 2020**

Vincent Mallet, Nathanael Beeker, Samir Bouam, Philippe Sogni, Stanislas Pol for  
the Demosthenes research group

Table of contents

|                                                                              |    |
|------------------------------------------------------------------------------|----|
| List of investigators: the Demosthenes research group.....                   | 2  |
| Methods: ICD-10 and French common classification of medical procedures ..... | 3  |
| Fig. S1.....                                                                 | 7  |
| Table S1 .....                                                               | 8  |
| Table S2 .....                                                               | 9  |
| Table S3 .....                                                               | 10 |
| Table S4 .....                                                               | 11 |

## **List of investigators: the Demosthenes research group**

Vincent Mallet,<sup>1</sup> Nathanaël Beeker,<sup>2</sup> Samir Bouam,<sup>3</sup> Hélène Fontaine;<sup>1</sup> Marion Corouge;<sup>1</sup>

Anaïs Vallet Pichard,<sup>1</sup> Clémence Hollande,<sup>1</sup> Loriane Lair Mehiri,<sup>1</sup> Philippe Sogni,<sup>1</sup> Stanislas

Pol<sup>1</sup>

1. Université de Paris, AP-HP.Centre, Groupe Hospitalier Cochin Port Royal, DMU Cancérologie et spécialités médico-chirurgicales, Service d'Hépatologie, Paris, France
2. AP-HP.Centre, Groupe Hospitalier Cochin Port Royal, DMU PRIME, Unité de Recherche Clinique, Paris, France
3. AP-HP.Centre, Groupe Hospitalier Cochin Port Royal, DMU PRIME, Unité d'Information Médicale, Paris, France

## **Methods: ICD-10 and French common classification of medical procedures**

**Acute\_kidney\_injury**, N17, JVJF002, JVJF003, JVJF005, JVJF006, JVJF007, JVJF005, JVJB002,

**Acute\_liver\_failure**, K720, K729,

**Acute\_respiratory\_failure**, J960, J962, J969, J80,

**Aids**, B20, B21, B22, B24,

**Alcoholic\_liver\_disease**, K70,

**Arterial\_embolism\_and\_thrombosis**, I74,

**Ascitis**, R18, HPHB003, HPJB001,

**Alcohol\_use\_disorders**, E244, E511, F101, F102, F103, F104, F105, F106, F107, F108, F109, F1020, F1021, F1022, F1023, G312, G621, G721, I426, K292, K70, K852, K860, O354, Z502, Z714, Z721,

**Autoimmune\_hepatitis**, K754,

**Budd\_chiari\_syndrome**, I820,

**Intrahepatic\_cholangiocarcinoma**, C221,

**Cerebral\_infarction**, I63,

**Cerebrovascular\_disease**, G45, G46, H340, I6,

**Cholangitis**, K830, K831, K835, K835, K8705, R17,

**Chronic\_kidney\_disease\_advanced**, I120, I131, N00, N01, N03, N05, N183, N184, N185, N19, N250, Z490, Z491, Z492, Z940, Z992, HGPC005, HPGA001, HPJP001, HPKA002, HPKB001, HPKC014, HPLA005, HPLB004, HPLC035, HPPA004, HPPP002, JVRP007, JVRP008, JAEA003, JVJB001, JVRP004, JVJF004, JVJF008, JVQF001, JVQF007, JVQP002, JVQP009, YYYYY007,

**Chronic\_kidney\_disease**, E102, E112, E122, E132, E142, I151, JAHB001, JAHH002, JAHC001, JAHA001, JAHJ006, JAHJ007, N02, N04, N06, N07, N08, N181, N182, N19, N25, N083,

**Chronic\_obstructive\_pulmonary\_disase**, I278, I279, J40, J41, J42, J43, J44, J45, J46, J47, J60, J61, J62, J63, J64, J65, J66, J67, J684, J701, J703,

**Cirrhosis**, I859, I864, I982, I9829, K703, K717, K743, K744, K745, K746, K766,

**Congestive\_heart\_failure**, I099, I110, I130, I132, I255, I420, I425, I426, I427, I428, I429, I43, I50, P290,

**Connective\_tissue\_disorder**, M05, M06, M315, M32, M33, M34, M351, M353, M360,

**Covid\_19**, U0710, U0711, U0712, U0714, U0715,

**Covid\_19\_sequellae**, U089, U099, U109,

**Covid\_19\_sirs**, U109,

**Decompensated\_cirrhosis, Cirrhosis &** (R17, K704, K711, K72, K767, I280, I850, I983, I9820, R18, J948, K65, EHBD001, EHNE002, HESE001, HESE002, HPHB003, HPJB001, EHCA003, EHCA006, EHCA009, EHCA007, EHCA004, EHCA002, EHCA005, EHCA010, EHCA001, HEPA005, HEPA004, HEPA007),

**Dementia,** F00, F01, F02, F03, F051, G30, G311,

**Diabetes\_mellitus\_complicated,** E102, E103, E104, E105, E107, E112, E113, E114, E115, E117, E122, E113, E114, E115, E127, E132, E133, E134, E135, E137, E142, E143, E144, E145, E147, H360, N083, H280, G632,

**Diabetes\_mellitus\_uncomplicated,** E100, E101, E106, E108, E109, E110, E111, E116, E118, E119, E120, E121, E126, E128, E129, E130, E131, E136, E138, E139, E140, E141, E146, E148, E149,

**Diabetes\_mellitus,** E1,

**Eccor,** GLJF010,

**Embolism\_and\_thrombosis\_of\_renal\_vein,** I828,

**Embolism\_and\_thrombosis\_of\_unspecified\_vein,** I829,

**Embolism\_and\_thrombosis\_of\_vena\_cava,** I822,

**Flu,** J09, J10, J11,

**Gastro\_esophageal\_varices\_bleeding,** I850, I983, I9820, EHBD001, EHNE002, HESE001, HESE002,

**Gastro\_esophageal\_varices\_not\_bleeding,** I859, I864, I982, I9829,

**Hemiplegia,** G041, G114, G801, G802, G81, G82, G830, G831, G832, G833, G834, G839,

**Hepatitis\_B\_virus,** B181, B162, B169,

**Hepatitis\_C\_virus,** B182,

**Hepatitis\_D\_virus,** B160, B161, B180, B170,

**Hepatic\_encephalopathy,** K704, K711, K74,

**Hepatocellular\_carcinoma,** C220,

**Hepatopulmonary\_syndrome,** I280,

**Hepatorenal\_syndrome,** K767,

**Hydrothorax,** J948,

**Hypercholesterolemia\_pure,** E870,

**Hyperlipemia\_mixed,** E782,

**Hyperlipemia,** E780, E781, E782, E784, E785,

**Hypertension,** I10, I11, I12, I13, R030,

**Hypertensive\_heart\_failure\_with\_or\_without\_renal\_failure,** I10, I130, I132,

**Hypertriglyceridemia,** E871,

**Jaundice,** R17,

**Leukemia,** C91, C92, C93, C94, C95, C96,

**Liver\_biopsy**, HLHB001, HLHJ003, HLHJ006, HLHH006, HLHJ005, HLHH007, HLHH001, HLHH005,

**Liver\_disease\_mild**, K713, K714, K715, K73, K740, K741, K742, K743, K760, K764, K765,

**Liver\_disease\_moderate\_to\_severe**, K703, I850, I859, I864, I982, J948, K703, K704, K711, K717, K721, K729, K744, K745, K746, K65, K66, K767, R17, R18, EHBD001, EHNE002, HESE001, HESE002, HPHB003, HPJB001, EHCA003, EHCA006, EHCA009, EHCA007, EHCA004, EHCA002, EHCA005, EHCA010, EHCA001, HEPA005, HEPA004, HEPA007,

**Liver\_transplantation**, Z944, HLEA001, HGEA002, HLEA002, HGEA004,

**Lymphoma**, C81, C82, C83, C84, C85, C86, C87, C89, C90,

**Mechanical\_ventilation**, GLLD004, GLLD005, GLLD006, GLLD007, GLLD008, GLLD009, GLLD012, GLLD013, GLLD015, DKMD001, GEPA004, GELD002, GELD004,

**Myocardial\_infarction**, I21, I22, I252,

**Obesity**, E66,

**Other\_cause\_of\_chronic\_liver\_disease**, E831, E84, FEJF003, FEJF006, FEJF008, E830, N163, I820, K743, K754, K830, Q44, T864, Z944,

**Other\_diabetes\_mellitus**, E12, E13, E14,

**Other\_primary\_liver\_cancers**, C222, C223, C224, C227, C229,

**Oxygen\_therapy**, GLLD002, GLLD003, GLLD017, GLLD019,

**Paraplegia\_hemiplegia**, G041, G114, G801, G802, G81, G82, G830, G831, G832, G833, G834, G839,

**Peptic\_ulcer\_disease**, K25, K26, K27, K28,

**Peripheral\_vascular\_disease**, I70, I71, I731, I738, I739, I771, I790, I792, K551, K558, K559, R02, Z958, Z959,

**Phlebitis\_and\_thrombophlebitis**, I80,

**Plasma\_exchange**, FEJF001, FEJF002,

**Portal\_hypertension**, K766,

**Portal\_vein\_thrombosis**, I81,

**Primary\_liver\_cancer**, C220, C221, C229,

**Pulmonary\_embolism**, I26,

**Renal\_transplantation**, T861, Z940, JAEA003,

**Renal\_replacement\_therapy**, JVJF002, JVJF003, JVJF005, JVJF006, JVJF007, JVJF005, JVJB002,

**Smoking**, F17, Z716, Z720, T652,

**Solid\_tumor\_localised\_without\_liver**, C0, C1, C20, C21, C23, C25, C26, C3, C40, C41, C43, C45, C46, C47, C48, C49, C5, C6, C70, C71, C72, C73, C74, C75, C76,

**Solid\_tumor\_metastatic**, C77, C78, C79, C80,

**Splanchnic\_thrombophlebitis**, I81, I82,

**Surgical\_shunt**, EHCA003, EHCA006, EHCA009, EHCA007, EHCA004, EHCA002, EHCA005, EHCA010, EHCA001, HEPA005, HEPA004, HEPA007,

**Thrombophlebitis\_migrans**, I821,

TIPS, EHCF002, EHAF004, EHPF001, EHNH001,

**Transfusion**, FELF003, FELF004,

**Transplant\_recipient\_without\_liver**, Z940, Z941, Z942, Z943, Z9481, Z9482, T861, T862, T863, T8680, T8681, T8682, Z94801, Z94802, Z94803, Z94804, Z94809, T860, JAEA003,

**Type\_1\_diabetes\_mellitus**, E10,

**Type\_2\_diabetes\_mellitus**, E11,

**Vasopressors**, EQLF001, EQLF001

**Fig. S1: Interaction between alcohol use disorders and first and second pandemic waves**

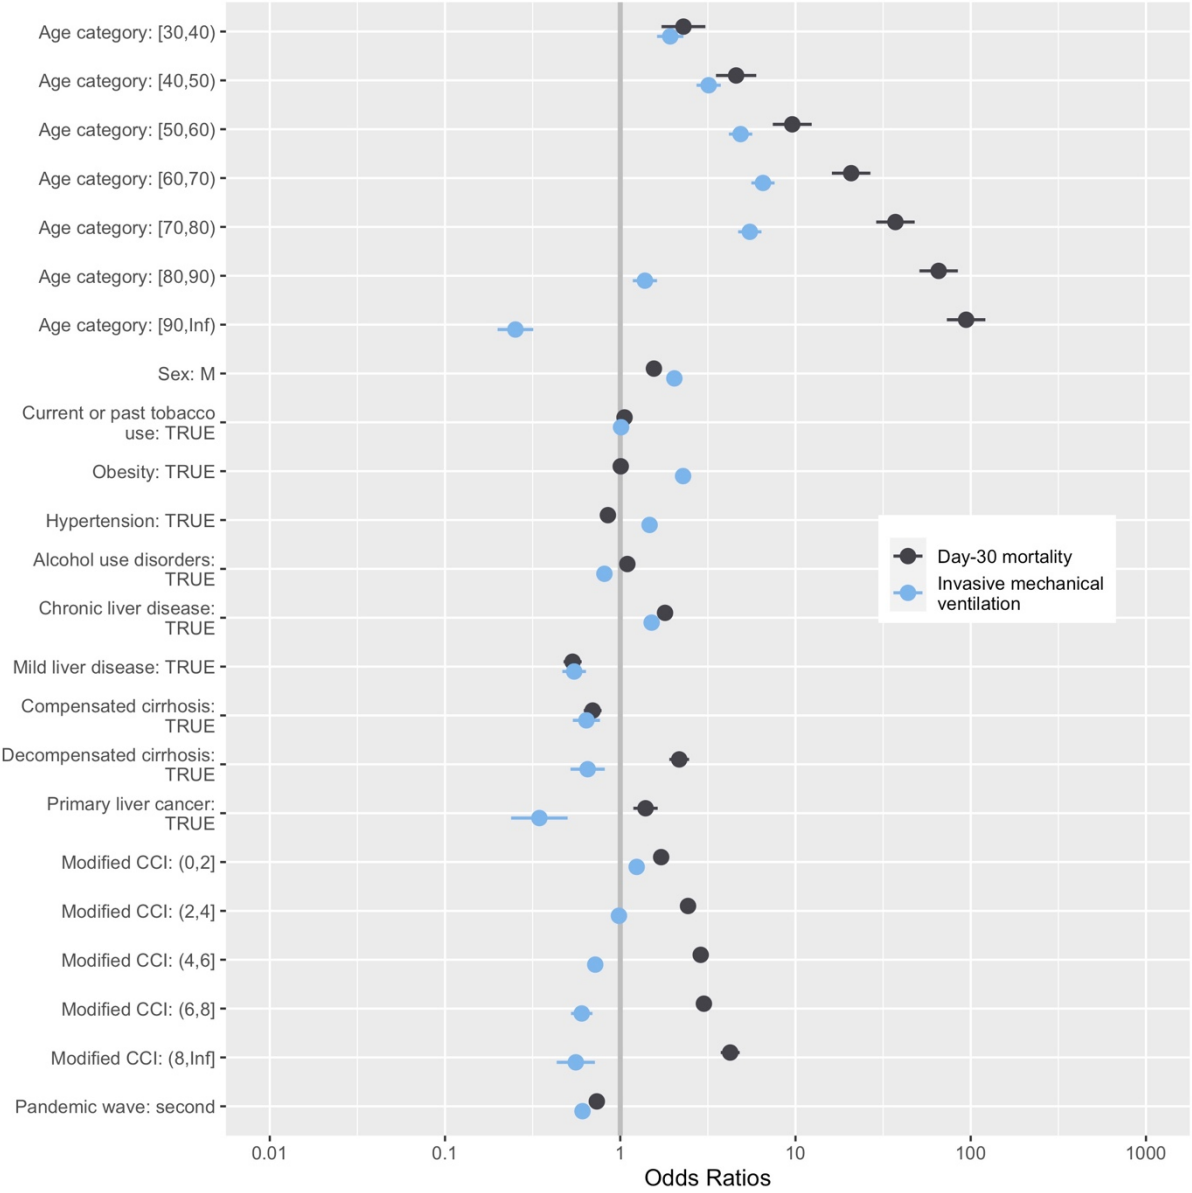

Odds ratios were computed with multivariate binary logistic regressions. Data are for patients who were hospitalized for Covid-19 between February 1 and December 31, 2020 in Metropolitan France. The 2011-2020 French National Patient Registry was used to identify underlying conditions before Covid-19. The Charlson comorbidity index predicts 10-year survival in patients with multiple comorbidities, and ranges from 0 to 39, with higher scores indicating higher frailty. Decompensated cirrhosis is cirrhosis with ascites, hypertensive bleeding, non-obstructive jaundice, or encephalopathy, before Covid-19. Note: M: Male; F: Female"

**Table S1: Charlson comorbidity index by chronic liver disease**

| Characteristic                                                                   | Overall,<br>N = 259,110 <sup>1</sup> | Chronic liver disease           |                                 | p-value <sup>2</sup> |
|----------------------------------------------------------------------------------|--------------------------------------|---------------------------------|---------------------------------|----------------------|
|                                                                                  |                                      | No,<br>n = 243,634 <sup>1</sup> | Yes,<br>n = 15,476 <sup>1</sup> |                      |
| Acquired immunodeficiency syndrome                                               | 1,118<br>(0.4%)                      | 893<br>(0.4%)                   | 225<br>(1.5%)                   | <0.001               |
| Cerebrovascular accident with minor or no residua and transient ischemic attacks | 12,403<br>(4.8%)                     | 11,231<br>(4.6%)                | 1,172<br>(7.6%)                 | <0.001               |
| Chronic kidney disease                                                           | 31,820<br>(12%)                      | 28,317<br>(12%)                 | 3,503<br>(23%)                  | <0.001               |
| Chronic obstructive pulmonary disease                                            | 33,781<br>(13%)                      | 30,938<br>(13%)                 | 2,843<br>(18%)                  | <0.001               |
| Congestive heart failure                                                         | 47,420<br>(18%)                      | 43,026<br>(18%)                 | 4,394<br>(28%)                  | <0.001               |
| Connective tissue disease                                                        | 4,328<br>(1.7%)                      | 3,975<br>(1.6%)                 | 353<br>(2.3%)                   | <0.001               |
| Dementia                                                                         | 28,419<br>(11%)                      | 27,144<br>(11%)                 | 1,275<br>(8.2%)                 | <0.001               |
| Diabetes mellitus                                                                | 56,982<br>(22%)                      | 51,555<br>(21%)                 | 5,427<br>(35%)                  | <0.001               |
| Hemiplegia                                                                       | 12,518<br>(4.8%)                     | 11,410<br>(4.7%)                | 1,108<br>(7.2%)                 | <0.001               |
| Leukemia                                                                         | 2,607<br>(1.0%)                      | 2,316<br>(1.0%)                 | 291<br>(1.9%)                   | <0.001               |
| Myocardial infarction                                                            | 5,539<br>(2.1%)                      | 4,941<br>(2.0%)                 | 598<br>(3.9%)                   | <0.001               |
| Lymphoma                                                                         | 3,500<br>(1.4%)                      | 3,123<br>(1.3%)                 | 377<br>(2.4%)                   | <0.001               |
| Peptic ulcer disease                                                             | 1,696<br>(0.7%)                      | 1,063<br>(0.4%)                 | 633<br>(4.1%)                   | <0.001               |
| Peripheral vascular disease                                                      | 19,200<br>(7.4%)                     | 16,914<br>(6.9%)                | 2,286<br>(15%)                  | <0.001               |
| Solid tumor                                                                      | 23,160<br>(8.9%)                     | 19,610<br>(8.0%)                | 3,550<br>(23%)                  | <0.001               |
| <b>At least one severe comorbidity</b>                                           | <b>145,363<br/>(56%)</b>             | <b>133,208<br/>(55%)</b>        | <b>12,155<br/>(79%)</b>         | <b>&lt;0.001</b>     |

Data are for patients who were discharged after Covid-19 between February 1 and December 31, 2020 in France. The 2011-2020 French National Patient Registry was used to identify underlying conditions before Covid-19.

<sup>1</sup> n (%)

<sup>2</sup> Pearson's Chi-squared test



**Table S2: Multivariate risks for mechanical ventilation after Covid-19**

| <i>Predictors</i>                 | <b>Mechanical ventilation</b> |             |          |
|-----------------------------------|-------------------------------|-------------|----------|
|                                   | <i>Odds Ratios</i>            | <i>CI</i>   | <i>p</i> |
| (Intercept)                       | 0.01                          | 0.01 – 0.01 | <0.001   |
| Age category: [30,40)             | 1.94                          | 1.63 – 2.31 | <0.001   |
| Age category: [40,50)             | 3.27                          | 2.78 – 3.83 | <0.001   |
| Age category: [50,60)             | 5.05                          | 4.33 – 5.89 | <0.001   |
| Age category: [60,70)             | 6.93                          | 5.95 – 8.07 | <0.001   |
| Age category: [70,80)             | 5.91                          | 5.07 – 6.89 | <0.001   |
| Age category: [80,90)             | 1.51                          | 1.29 – 1.77 | <0.001   |
| Age category: [90,Inf)            | 0.28                          | 0.22 – 0.35 | <0.001   |
| Sex: M                            | 2.04                          | 1.97 – 2.11 | <0.001   |
| Current or past tobacco use: TRUE | 1.03                          | 0.97 – 1.10 | 0.265    |
| Obesity: TRUE                     | 2.32                          | 2.23 – 2.40 | <0.001   |
| Hypertension: TRUE                | 1.52                          | 1.47 – 1.58 | <0.001   |
| Alcohol use disorders: TRUE       | 0.82                          | 0.76 – 0.89 | <0.001   |
| Chronic liver disease: TRUE       | 1.54                          | 1.44 – 1.64 | <0.001   |
| Mild liver disease: TRUE          | 0.55                          | 0.47 – 0.64 | <0.001   |
| Compensated cirrhosis: TRUE       | 0.64                          | 0.53 – 0.76 | <0.001   |
| Decompensated cirrhosis: TRUE     | 0.65                          | 0.52 – 0.81 | <0.001   |
| Primary liver cancer: TRUE        | 0.34                          | 0.24 – 0.50 | <0.001   |
| Modified CCI: [2,4)               | 0.97                          | 0.93 – 1.01 | 0.121    |
| Modified CCI: [4,6)               | 0.73                          | 0.68 – 0.77 | <0.001   |
| Modified CCI: [6,8)               | 0.54                          | 0.48 – 0.59 | <0.001   |
| Modified CCI: [8,Inf]             | 0.56                          | 0.48 – 0.66 | <0.001   |
| Pandemic wave: second             | 0.61                          | 0.59 – 0.63 | <0.001   |
| <b>Observations</b>               | 259,109                       |             |          |
| <b>R<sup>2</sup> Tjur</b>         | 0.067                         |             |          |

Data are for patients who were discharged after Covid-19 between February 1 and December 31, 2020 in France. The 2011-2020 French National Patient Registry was used to identify underlying conditions before Covid-19. Mild liver disease was chronic liver disease without cirrhosis. Decompensated cirrhosis was cirrhosis with ascites, hypertensive bleeding, non-obstructive jaundice, or encephalopathy, before Covid-19. The Charlson comorbidity index predicts 10-year survival in patients with multiple comorbidities, and ranges from 0 to 30, without entering age and liver disease, with higher scores indicating higher frailty. Note: CCI : Charlson comorbidity index; M: Male

**Table S3: Multivariate risks for day-30 mortality after Covid-19**

| <i>Predictors</i>                        | <b>Day-30 mortality</b> |                |                  |
|------------------------------------------|-------------------------|----------------|------------------|
|                                          | <i>Odds Ratios</i>      | <i>CI</i>      | <i>p</i>         |
| (Intercept)                              | 0.00                    | 0.00 – 0.01    | <b>&lt;0.001</b> |
| <b>Age category: [30,40)</b>             | 2.33                    | 1.74 – 3.11    | <b>&lt;0.001</b> |
| <b>Age category: [40,50)</b>             | 4.77                    | 3.66 – 6.22    | <b>&lt;0.001</b> |
| <b>Age category: [50,60)</b>             | 10.19                   | 7.89 – 13.17   | <b>&lt;0.001</b> |
| <b>Age category: [60,70)</b>             | 22.72                   | 17.63 – 29.29  | <b>&lt;0.001</b> |
| <b>Age category: [70,80)</b>             | 41.24                   | 32.01 – 53.13  | <b>&lt;0.001</b> |
| <b>Age category: [80,90)</b>             | 74.07                   | 57.51 – 95.40  | <b>&lt;0.001</b> |
| <b>Age category: [90,Inf)</b>            | 107.49                  | 83.41 – 138.52 | <b>&lt;0.001</b> |
| <b>Sex: M</b>                            | 1.56                    | 1.52 – 1.59    | <b>&lt;0.001</b> |
| <b>Current or past tobacco use: TRUE</b> | 1.08                    | 1.03 – 1.13    | <b>0.002</b>     |
| <b>Obesity: TRUE</b>                     | 1.02                    | 0.99 – 1.05    | 0.155            |
| <b>Hypertension: TRUE</b>                | 0.87                    | 0.85 – 0.89    | <b>&lt;0.001</b> |
| <b>Alcohol use disorders: TRUE</b>       | 1.11                    | 1.05 – 1.17    | <b>&lt;0.001</b> |
| <b>Chronic liver disease: TRUE</b>       | 1.79                    | 1.71 – 1.87    | <b>&lt;0.001</b> |
| <b>Mild liver disease: TRUE</b>          | 0.54                    | 0.48 – 0.61    | <b>&lt;0.001</b> |
| <b>Compensated cirrhosis: TRUE</b>       | 0.71                    | 0.63 – 0.80    | <b>&lt;0.001</b> |
| <b>Decompensated cirrhosis: TRUE</b>     | 2.21                    | 1.94 – 2.51    | <b>&lt;0.001</b> |
| <b>Primary liver cancer: TRUE</b>        | 1.38                    | 1.17 – 1.62    | <b>&lt;0.001</b> |
| <b>Modified CCI: [2,4)</b>               | 1.82                    | 1.77 – 1.86    | <b>&lt;0.001</b> |
| <b>Modified CCI: [4,6)</b>               | 2.14                    | 2.07 – 2.22    | <b>&lt;0.001</b> |
| <b>Modified CCI: [6,8)</b>               | 2.40                    | 2.27 – 2.52    | <b>&lt;0.001</b> |
| <b>Modified CCI: [8,Inf]</b>             | 3.11                    | 2.86 – 3.39    | <b>&lt;0.001</b> |
| <b>Pandemic wave: second</b>             | 0.73                    | 0.72 – 0.75    | <b>&lt;0.001</b> |
| Observations                             | 259,109                 |                |                  |
| R <sup>2</sup> Tjur                      | 0.137                   |                |                  |

Data are for patients who were discharged after Covid-19 between February 1 and December 31, 2020 in France. The 2011-2020 French National Patient Registry was used to identify underlying conditions before Covid-19. Mild liver disease was chronic liver disease without cirrhosis. Decompensated cirrhosis was cirrhosis with ascites, hypertensive bleeding, non-obstructive jaundice, or encephalopathy, before Covid-19. The Charlson comorbidity index predicts 10-year survival in patients with multiple comorbidities, and ranges from 0 to 30, without entering age and liver disease, with higher scores indicating higher frailty. Note: CCI : Charlson comorbidity index; M: Male

**Table S4: Characteristics of propensity-matched Covid-19 patients by primary liver cancer**

| Characteristic                | Overall, N =<br>1,182 <sup>1</sup> | Primary liver cancer        |                              | p-value <sup>2</sup> |
|-------------------------------|------------------------------------|-----------------------------|------------------------------|----------------------|
|                               |                                    | No,<br>n = 591 <sup>1</sup> | Yes,<br>N = 591 <sup>1</sup> |                      |
| <b>Mechanical ventilation</b> | 186 (16%)                          | 112 (19%)                   | 74 (13%)                     | 0.002                |
| <b>Age category</b>           |                                    |                             |                              | >0.9                 |
| <b>[18,30)</b>                | 13 (1.1%)                          | 6 (1.0%)                    | 7 (1.2%)                     |                      |
| <b>[30,40)</b>                | 10 (0.8%)                          | 5 (0.8%)                    | 5 (0.8%)                     |                      |
| <b>[40,50)</b>                | 55 (4.7%)                          | 28 (4.7%)                   | 27 (4.6%)                    |                      |
| <b>[50,60)</b>                | 116 (9.8%)                         | 57 (9.6%)                   | 59 (10.0%)                   |                      |
| <b>[60,70)</b>                | 327 (28%)                          | 165 (28%)                   | 162 (27%)                    |                      |
| <b>[70,80)</b>                | 424 (36%)                          | 212 (36%)                   | 212 (36%)                    |                      |
| <b>[80,90)</b>                | 206 (17%)                          | 103 (17%)                   | 103 (17%)                    |                      |
| <b>[90,Inf]</b>               | 31 (2.6%)                          | 15 (2.5%)                   | 16 (2.7%)                    |                      |
| <b>Sex</b>                    |                                    |                             |                              | 0.9                  |
| <b>F</b>                      | 354 (30%)                          | 176 (30%)                   | 178 (30%)                    |                      |
| <b>M</b>                      | 828 (70%)                          | 415 (70%)                   | 413 (70%)                    |                      |
| <b>Obesity</b>                | 276 (23%)                          | 137 (23%)                   | 139 (24%)                    | 0.9                  |
| <b>Hypertension</b>           | 719 (61%)                          | 362 (61%)                   | 357 (60%)                    | 0.8                  |
| <b>Diabetes mellitus</b>      | 497 (42%)                          | 250 (42%)                   | 247 (42%)                    | 0.9                  |
| <b>Day-30 mortality</b>       | 341 (29%)                          | 168 (28%)                   | 173 (29%)                    | 0.7                  |
| <b>Modified CCI</b>           | 3 (1, 6)                           | 3 (1, 6)                    | 3 (1, 6)                     | >0.9                 |

Data are for patients who were discharged after Covid-19 between February 1 and December 31, 2020 in France. The 2011-2020 French National Patient Registry was used to identify underlying conditions before Covid-19. Mild liver disease was chronic liver disease without cirrhosis. Advanced cirrhosis was cirrhosis with ascites, hypertensive bleeding, non-obstructive jaundice, or encephalopathy, before Covid-19. The Charlson comorbidity index predicts 10-year survival in patients with multiple comorbidities, and ranges from 0 to 30, without entering age and liver disease, with higher scores indicating higher frailty. Note: CCI: Charlson comorbidity index. M: Male; F: Female

<sup>1</sup> n (%); Median (IQR)

<sup>2</sup> Pearson's Chi-squared test; Wilcoxon rank sum test
